# Supplementary material for: Microarray characterization of gene expression changes in blood during acute ethanol exposure
Source: PubMed Central journal article supplement (PMC3750403; doi:10.1186/1755-8794-6-26), 2013-07-25
Supplement: 1755-8794-6-26-S1.pdf [file 1755-8794-6-26-S1.pdf]

**Additional File 1. Total RNA yield and integrity**

| <b>Sample</b>       | <b>260/280<br/>Ratio</b> | <b>Yield<br/>ug</b> | <b>RIN<br/>Range 1-10</b> |
|---------------------|--------------------------|---------------------|---------------------------|
| <b>Experimental</b> |                          |                     |                           |
| S1 - BAC1           | 3.76                     | 7.31                | 7.6                       |
| S1 - BAC2           | 1.90                     | 12.46               | 7.2                       |
| S1 - BAC3           | 1.97                     | 15.50               | 7.7                       |
| S1 - BAC4           | 2.02                     | 14.28               | 7.4                       |
| S1 - BAC5           | 2.18                     | 10.60               | 7.6                       |
|                     |                          |                     |                           |
| S5 - BAC1           | 1.84                     | 8.15                | 7.5                       |
| S5 - BAC2           | 1.98                     | 7.18                | 8.4                       |
| S5 - BAC3           | 1.89                     | 8.32                | 8.7                       |
| S5 - BAC4           | 2.51                     | 5.20                | 8.7                       |
| S5 - BAC5           | 1.92                     | 9.42                | 8.4                       |
|                     |                          |                     |                           |
| S8 - BAC1           | 1.81                     | 7.18                | 7.5                       |
| S8 - BAC2           | 1.62                     | 5.07                | 8.7                       |
| S8 - BAC3           | 1.57                     | 4.08                | 7.9                       |
| S8 - BAC4           | 1.61                     | 1.58                | 8.8                       |
| S8 - BAC5           | 1.49                     | 3.41                | 8.0                       |
|                     |                          |                     |                           |
| S10 - BAC1          | 1.93                     | 8.41                | 7.5                       |
| S10 - BAC2          | 1.85                     | 9.26                | 8.3                       |
| S10 - BAC3          | 1.76                     | 5.95                | 7.5                       |
| S10 - BAC4          | 1.85                     | 4.75                | 8.1                       |
| S10 - BAC5          | 1.88                     | 9.33                | 8.0                       |
|                     |                          |                     |                           |
| S13 - BAC1          | 1.58                     | 10.22               | 8.1                       |
| S13 - BAC2          | 1.96                     | 9.21                | 8.5                       |
| S13 - BAC3          | 1.95                     | 11.02               | 8.1                       |
| S13 - BAC4          | 1.69                     | 7.73                | 9.1                       |
| S13 - BAC5          | 2.08                     | 3.17                | 9.0                       |
|                     |                          |                     |                           |
| S15 - BAC1          | 1.90                     | 10.95               | 8.3                       |
| S15 - BAC2          | 1.93                     | 8.24                | 9.2                       |
| S15 - BAC3          | 2.00                     | 9.22                | 8.2                       |
| S15 - BAC4          | 1.90                     | 5.14                | 8.7                       |
| S15 - BAC5          | 1.87                     | 8.69                | 9.3                       |
|                     |                          |                     |                           |
| S17 - BAC1          | 1.91                     | 8.87                | 8.3                       |
| S17 - BAC2          | 1.87                     | 6.20                | 8.5                       |
| S17 - BAC3          | 2.36                     | 8.91                | 8.6                       |
| S17 - BAC4          | 2.02                     | 6.12                | 8.7                       |
| S17 - BAC5          | 2.00                     | 16.40               | 9.3                       |
|                     |                          |                     |                           |
| S18 - BAC1          | 2.08                     | 13.59               | 8.2                       |
| S18 - BAC2          | 2.09                     | 12.71               | 8.3                       |
| S18 - BAC3          | 2.15                     | 14.75               | 8.8                       |
| S18 - BAC4          | 2.36                     | 9.47                | 8.8                       |
| S18 - BAC5          | 2.79                     | 15.31               | 8.5                       |

|                |      |       |     |
|----------------|------|-------|-----|
| S19 - BAC1     | 2.02 | 20.56 | 8.4 |
| S19 - BAC2     | 2.05 | 14.33 | 8.4 |
| S19 - BAC3     | 1.97 | 20.98 | 8.3 |
| S19 - BAC4     | 2.03 | 13.80 | 8.8 |
| S19 - BAC5     | 1.97 | 16.33 | 8.7 |
| <b>Control</b> |      |       |     |
| S51-T1         | 1.87 | 0.71  | ND  |
| S51-T2         | 2.12 | 6.16  | 9.6 |
| S51-T3         | 2.14 | 8.50  | 9.5 |
| S51-T4         | 2.11 | 2.85  | 8.9 |
| S51-T5         | 2.11 | 7.64  | 9.7 |
| S52-T1         | 2.11 | 7.82  | 9.2 |
| S52-T2         | 2.14 | 10.40 | 9.5 |
| S52-T3         | 2.13 | 10.32 | 9.5 |
| S52-T4         | 2.1  | 9.14  | 9.3 |
| S52-T5         | 2.12 | 11.71 | 9.6 |
| S53-T1         | 2.12 | 9.87  | 9.4 |
| S53-T2         | 2.13 | 10.46 | 9.6 |
| S53-T3         | 2.12 | 10.68 | 9.6 |
| S53-T4         | 2.12 | 8.22  | 9.5 |
| S53-T5         | 2.12 | 12.02 | 9.3 |
| S54-T1         | 2.1  | 7.80  | 9.5 |
| S54-T2         | 2.13 | 4.32  | 9.5 |
| S54-T3         | 2.11 | 5.41  | 9.7 |
| S54-T4         | 2.09 | 6.04  | 9.7 |
| S54-T5         | 2.11 | 5.12  | 9.7 |
| S56-T1         | 2.09 | 14.35 | 9.9 |
| S56-T2         | 2.12 | 13.00 | 9.3 |
| S56-T3         | 2.12 | 14.85 | 9   |
| S56-T4         | 2.11 | 12.50 | 9.5 |
| S56-T5         | 2.11 | 14.05 | 9.3 |

NA-Not applicable, sample failed

ND-not done
