# Supplementary material for: Microarray characterization of gene expression changes in blood during acute ethanol exposure
Source: PubMed Central journal article supplement (PMC3750403; doi:10.1186/1755-8794-6-26), 2013-07-25
Supplement: 1755-8794-6-26-S2.pdf [file 1755-8794-6-26-S2.pdf]

**Additional File 2. Primers used in study**

| Refseq Accession ID      | Affymetrix Probeset ID | Gene    | Sense Primer               | Anti-sense Primer        | Intron spanning | Amplicon Size(bp) | *Position 5' | Position 3' | Transcript Length(bp) | Affymetrix Target | Cycling temperature | Primer concentration S/A uM |
|--------------------------|------------------------|---------|----------------------------|--------------------------|-----------------|-------------------|--------------|-------------|-----------------------|-------------------|---------------------|-----------------------------|
| <b>Normalizers</b>       |                        |         |                            |                          |                 |                   |              |             |                       |                   |                     |                             |
| NM_002205                | 201389_at              | ITGA5   | TCAGACATTGGCACCTAATC       | TTCTGGCTTCTCCTAAATC      | NO              | 104               | 3879         | 3982        | 4248                  | 3725-4193         | 54                  | 300/300                     |
| NM_002661                | 204613_at              | PLCG2   | GCAGATGAATCACGCATTG        | GAGCACCGAGAACCTTG        | YES             | 149               | 3215         | 3363        | 4263                  | 3666-4214         | 54                  | 300/200                     |
| NM_005697                | 218143_s_at            | SCAMP2  | GGACAGCGGTTGGATTG          | GAGAGCACGGCACAGAG        | YES             | 108               | 803          | 910         | 1292                  | 818-1150          | 54                  | 300/200                     |
| <b>Genes of Interest</b> |                        |         |                            |                          |                 |                   |              |             |                       |                   |                     |                             |
| NM_015199                | 226025_at              | ANKRD28 | CATAAATTAAGCATCACTAAAGTCTC | CCGAAATATCAGCCTTCTCTC    | NO              | 199               | 4379         | 4577        | 6339                  | 4387-4920         | 54                  | 250/300                     |
| NM_014210                | 204774_at              | EVI2A   | ACAAGTAGGCAAGCGTCAG        | TGTGAGCACTCCAGTAGATTG    | NO              | 139               | 866          | 1004        | 1572                  | 994-1486          | 57                  | 250/250                     |
| NM_004117                | 224840_at              | FKBP5   | TTTAAAAGCCCCAGTCTCACC      | CACACACCTTCCCCTCCC       | NO              | 256               | 3257         | 3522        | 3772                  | 3262-3678         | 57                  | 150/200                     |
| NM_014020                | 220532_s_at            | LR8     | GCAGAAGGAGGAGTGTAGAG       | ACAGGACAATGGCAGTGG       | YES             | 251               | 849          | 1099        | 1330                  | 739-1271          | 57                  | 250/250                     |
| NM_014372                | 208924_at              | RNF11   | CCTCTTGCTTGAACCATAG        | ATTCTGCGTTTGTGTGC        | NO              | 196               | 2197         | 2374        | 3139                  | 2143-2656         | 53                  | 200/200                     |
| NM_021259                | 221882_s_at            | TMEM8   | CCCTGCCTCTTTGCCTTC         | TAGTAGTAGTTGTCGCTAGTCATC | YES             | 179               | 2067         | 2245        | 2530                  | 1953-2508         | 57                  | 250/250                     |
| NM_001785                | 205627_at              | CDA     | GTGACAGCCAGAGAATGCC        | CGGTGTTCTAAGTCCAAGG      | NO              | 192               | 617          | 808         | 957                   | 372-882           | 57                  | 250/250                     |
| NM_014214                | 203126_at              | IMPA2   | GATTAACATATGGGCGGGATG      | CCAGCCACTCACTGTAGC       | NO              | 182               | 1051         | 1232        | 1500                  | 950-1336          | 58                  | 300/250                     |

\*Position numbers refer to the refseq transcript.

S/A sense/antisense
