# Supplementary material for: Microarray characterization of gene expression changes in blood during acute ethanol exposure
Source: PubMed Central journal article supplement (PMC3750403; doi:10.1186/1755-8794-6-26), 2013-07-25
Supplement: 1755-8794-6-26-S3.pdf [file 1755-8794-6-26-S3.pdf]

**Additional File 3. K means expression cluster members.**

| 1            | 2           | 3            | 4           | 5            | 6           | 7            | No Cluster               |
|--------------|-------------|--------------|-------------|--------------|-------------|--------------|--------------------------|
| Probe Set ID | Gene Symbol | Probe Set ID | Gene Symbol | Probe Set ID | Gene Symbol | Probe Set ID | Gene Symbol              |
| 1557987_at   | ---         | 226392_at    | ---         | 226399_at    | ---         | 1555303_at   | ---                      |
| 1566959_at   | ---         | 226641_at    | ---         | 226444_at    | ---         | 235735_at    | ---                      |
| 222375_at    | ---         | 229629_at    | ---         | 203156_at    | AKAP11      | 204265_s_at  | GPSM3                    |
| 235028_at    | ---         | 243495_s_at  | ---         | 226025_at    | ANKRD28     | 34031_i_at   | KRIT1                    |
| 242874_at    | ---         | 221505_at    | ANP32E      | 220940_at    | ANKRD36B    | 207079_s_at  | MED6                     |
| 1558015_s_at | ACTR2       | 221230_s_at  | ARID4B      | 212614_at    | ARID5B      | 201502_s_at  | NFKBIA                   |
| 200612_s_at  | AP2B1       | 203427_at    | ASF1A       | 209903_s_at  | ATR         | 220001_at    | PADI4                    |
| 211833_s_at  | BAX         | 208861_s_at  | ATRX        | 203531_at    | CUL5        | 200919_at    | PHC2                     |
| 223559_s_at  | C9orf80     | 202265_at    | BMI1        | 203302_at    | DCK         | 205863_at    | S100A12                  |
| 1556389_at   | CNPY3       | 224740_at    | C5orf43     | 205000_at    | DDX3Y       | 205789_at    | CD1D                     |
| 225140_at    | KLF3        | 200934_at    | DEK         | 222850_s_at  | DNAJB14     | 205627_at    | CDA                      |
| 201551_s_at  | LAMP1       | 209187_at    | DR1         | 219279_at    | DOCK10      | 203973_s_at  | CEBPD                    |
| 230528_s_at  | MGC2752     | 212149_at    | EFR3A       | 225290_at    | ETNK1       | 205382_s_at  | CFD                      |
| 221771_s_at  | MPHOSPH8    | 227462_at    | ERAP2       | 227239_at    | FAM126A     | 206380_s_at  | CFP                      |
| 207815_at    | PF4V1       | 217941_s_at  | ERBB2IP     | 201889_at    | FAM3C       | 202121_s_at  | CHMP2A                   |
| 226310_at    | RICTOR      | 217234_s_at  | EZR         | 226811_at    | FAM46C      | 222934_s_at  | CLEC4E                   |
| 202131_s_at  | RIOK3       | 229460_at    | FAM126B     | 203115_at    | FECH        | 217870_s_at  | CMPK1                    |
| 226825_s_at  | TMEM165     | 233898_s_at  | FGFR1OP2    | 225153_at    | GFM1        | 201360_at    | CST3                     |
| 235798_at    | TMEM170B    | 218313_s_at  | GALNT7      | 220577_at    | GVIN1       | 204971_at    | CSTA                     |
| 218345_at    | TMEM176A    | 221510_s_at  | GLS         | 202983_at    | HLTF        | 203028_s_at  | CYBA                     |
| 240383_at    | UBE2D3      | 224862_at    | GNAQ        | 205884_at    | ITGA4       | 222429_at    | DBNL                     |
| 208882_s_at  | UBR5        | 221763_at    | JMJD1C      | 1553530_a_at | ITGB1       | 226064_s_at  | DGAT2                    |
| 204619_s_at  | VCAN        | 226675_s_at  | MALAT1      | 226635_at    | LOC401504   | 219452_at    | DPEP2                    |
|              |             | 221760_at    | MAN1A1      | 228841_at    | LYRM7       | 201041_s_at  | DUSP1                    |
|              |             | 218499_at    | MST4        | 201151_s_at  | MBNL1       | 217992_s_at  | EFHD2                    |
|              |             | 212530_at    | NEK7        | 226039_at    | MGAT4A      | 203274_at    | F8A1 /// F8A2 /// F8A3   |
|              |             | 227354_at    | PAG1        | 224830_at    | NUDT21      | 218831_s_at  | FCGRT                    |
|              |             | 244008_at    | PARP8       | 221751_at    | PANK3       | 224840_at    | FKBP5                    |
|              |             | 226119_at    | PCMTD1      | 202741_at    | PRKACB      | 205119_s_at  | FPR1                     |
|              |             | 222572_at    | PDP1        | 218236_s_at  | PRKD3       | 200645_at    | GABARAP                  |
|              |             | 213111_at    | PIKFYVE     | 202677_at    | RASA1       | 217755_at    | HN1                      |
|              |             | 240413_at    | PYHIN1      | 222605_at    | RCOR3       | 205403_at    | IL1R2                    |
|              |             | 212636_at    | QKI         | 208924_at    | RNF11       | 203126_at    | IMPA2                    |
|              |             | 222717_at    | SDPR        | 218738_s_at  | RNF138      | 204169_at    | IMPDH1                   |
|              |             | 212887_at    | SEC23A      | 203403_s_at  | RNF6        | 202531_at    | IRF1                     |
|              |             | 1553177_at   | SH2D1B      | 226682_at    | RORA        | 226267_at    | JDP2                     |
|              |             | 225564_at    | SPATA13     | 212179_at    | SFRS18      | 218963_s_at  | KRT23                    |
|              |             | 230836_at    | ST8SIA4     | 213649_at    | SFRS7       | 217388_s_at  | KYNU                     |
|              |             | 212956_at    | TBC1D9      | 236265_at    | SP4         | 228648_at    | LRG1                     |
|              |             | 221428_s_at  | TBL1XR1     | 226529_at    | TMEM106B    | 201412_at    | LRP10                    |
|              |             | 224793_s_at  | TGFBR1      | 217826_s_at  | UBE2J1      | 1559502_s_at | LRRC25                   |
|              |             | 202606_s_at  | TLK1        | 224691_at    | UHMK1       | 236172_at    | LTB4R                    |
|              |             | 232591_s_at  | TMEM30A     | 202413_s_at  | USP1        | 205859_at    | LY86                     |
|              |             | 202778_s_at  | ZMYM2       | 218396_at    | VPS13C      | 213708_s_at  | MLX                      |
|              |             |              |             | 227309_at    | YOD1        | 203936_s_at  | MMP9                     |
|              |             |              |             | 222731_at    | ZDHHC2      | 204961_s_at  | NCF1 /// NCF1B /// NCF1C |
|              |             |              |             | 226015_at    | ZNF12       | 223944_at    | NLRP12                   |
|              |             |              |             |              |             | 218388_at    | PGLS                     |
|              |             |              |             |              |             | 41469_at     | PI3                      |
|              |             |              |             |              |             | 201400_at    | PSMB3                    |
|              |             |              |             |              |             | 211178_s_at  | PSTPIP1                  |
|              |             |              |             |              |             | 203175_at    | RHOG                     |
|              |             |              |             |              |             | 213566_at    | RNASE6                   |
|              |             |              |             |              |             | 224573_at    | RNASEK                   |

|  |  |  |              |          |  |  |
|--|--|--|--------------|----------|--|--|
|  |  |  | 203379_at    | RPS6KA1  |  |  |
|  |  |  | 200660_at    | S100A11  |  |  |
|  |  |  | 203186_s_at  | S100A4   |  |  |
|  |  |  | 217728_at    | S100A6   |  |  |
|  |  |  | 203535_at    | S100A9   |  |  |
|  |  |  | 1554624_a_at | SIRPB1   |  |  |
|  |  |  | 1559034_at   | SIRPB2   |  |  |
|  |  |  | 201463_s_at  | TALDO1   |  |  |
|  |  |  | 208700_s_at  | TKT      |  |  |
|  |  |  | 223482_at    | TMEM120A |  |  |
|  |  |  | 221882_s_at  | TMEM8A   |  |  |
|  |  |  | 207643_s_at  | TNFRSF1A |  |  |
|  |  |  | 202096_s_at  | TSPO     |  |  |
|  |  |  | 208864_s_at  | TXN      |  |  |

Calcium-binding
